# Supplementary material
Source: PubMed Central journal article supplement (PMC4838520)
Supplement: NIHMS761700-supplement-Supp_Appendix_S1.pdf [file NIHMS761700-supplement-Supp_Appendix_S1.pdf]

Appendix 1: Encounter form used by pharmacists in the offices randomized to the blood pressure intervention

|                               |                                                                                                                                             |
|-------------------------------|---------------------------------------------------------------------------------------------------------------------------------------------|
| <b>Patient Name:</b>          | <b>*Visit Date:</b><br>(mm/dd/yyyy)      _ _ / _ _ / _ _ _ _                                                                                |
| <b>Study ID #:</b><br>_ _ _ _ | <b>*Visit (check one):</b> <input type="checkbox"/> Initial <input type="checkbox"/> Follow-up <input type="checkbox"/> Phone Communication |
| <b>*Pharmacist:</b> _____     |                                                                                                                                             |

**CURRENT PRESCRIBED ANTIHYPERTENSIVE MEDICATION REGIMEN:**

| Prescribed HTN Medication | Dose | Dose2 | Unit | Freq | Currently Taking             |                             |
|---------------------------|------|-------|------|------|------------------------------|-----------------------------|
| Code: _ _ _ _             |      |       |      |      | <input type="checkbox"/> Yes | <input type="checkbox"/> No |
| Code: _ _ _ _             |      |       |      |      | <input type="checkbox"/> Yes | <input type="checkbox"/> No |
| Code: _ _ _ _             |      |       |      |      | <input type="checkbox"/> Yes | <input type="checkbox"/> No |
| Code: _ _ _ _             |      |       |      |      | <input type="checkbox"/> Yes | <input type="checkbox"/> No |

**BP MEASUREMENTS:** BP1 = \_ \_ \_ / \_ \_ \_    BP2 = \_ \_ \_ / \_ \_ \_    BP3(optional) = \_ \_ \_ / \_ \_ \_

**AVERAGE BP =** \_ \_ \_ / \_ \_ \_

**\*GOAL BP:** \_ \_ \_ / \_ \_ \_

**\*CURRENT BP IS CONTROLLED:**    Yes    No

**\*LIFESTYLE CHANGES RECOMMENDED TO PATIENT:** (check all that apply)

- ↓ weight   
  DASH plan   
  Other diet recommend.   
  ↓ sodium   
  ↑ activity   
  ↓ smoking   
  ↑ med compliance  
 Other: \_\_\_\_\_   
  No lifestyle changes recommended

**\*NEW PLAN/RECOMMENDATIONS:**  Continue current regimen     Recommend change to plan (List complete plan below.)

| Prescribed HTN Medication | Change Type* | Dose1 | Dose2 | Unit | Freq | Comments |
|---------------------------|--------------|-------|-------|------|------|----------|
| _____<br>Code: ____       |              |       |       |      |      |          |
| _____<br>Code: ____       |              |       |       |      |      |          |
| _____<br>Code: ____       |              |       |       |      |      |          |
| _____<br>Code: ____       |              |       |       |      |      |          |

\* Drug Change Types: a = drug started; b= dose increased; c = dose decreased; d = drug discontinued; e = no change

**\*PLANNED FOLLOW-UP:**  1 week     2 weeks     4 weeks     6 weeks     8 Weeks     3 Months      
 Other: \_\_\_\_\_

---

**\*PHYSICIAN ACCEPTANCE**

- Recommended plan accepted   
  Recommended plan modified (list complete final plan below)   
  Do not accept pharmacist plan/continue previous plan

**FINAL PLAN:** (Complete only if changed from pharmacist recommended plan)

| Prescribed HTN Medication | Change Type* | Dose1 | Dose2 | Unit | Freq | Prescribed HTN Medication | Change Type* | Dose1 | Dose2 | Unit | Freq |
|---------------------------|--------------|-------|-------|------|------|---------------------------|--------------|-------|-------|------|------|
| _____                     |              |       |       |      |      | _____                     |              |       |       |      |      |
| Code: _____               |              |       |       |      |      | Code: _____               |              |       |       |      |      |
| _____                     |              |       |       |      |      | _____                     |              |       |       |      |      |
| Code: _____               |              |       |       |      |      | Code: _____               |              |       |       |      |      |
| _____                     |              |       |       |      |      | _____                     |              |       |       |      |      |
| Code: _____               |              |       |       |      |      | Code: _____               |              |       |       |      |      |

\* Drug Change Types: a = drug started; b= dose increased; c = dose decreased; d = drug discontinued; e = no change

**Pharmacist Time Documentation**

Start time: \_\_\_\_\_ End time \_\_\_\_\_ Total time for this encounter: \_\_\_\_\_

Please complete the following by estimating the time you spent in each activity. The total time above should equal the total time in the table:

| Activity                                      | Minutes to complete activity (circle one)                                            |
|-----------------------------------------------|--------------------------------------------------------------------------------------|
| Medical record review prior to patient visit. | 1 2 3 4 5 6 7 8 9 10 11 12 13 14 15 16 17 18 19 20 21 22 23 24 25 26 27 28 29 30 >30 |
| Consultation with other provider or family    | 1 2 3 4 5 6 7 8 9 10 11 12 13 14 15 16 17 18 19 20 21 22 23 24 25 26 27 28 29 30 >30 |
| Patient assessment/medication history         | 1 2 3 4 5 6 7 8 9 10 11 12 13 14 15 16 17 18 19 20 21 22 23 24 25 26 27 28 29 30 >30 |
| Medical record review during patient visit    | 1 2 3 4 5 6 7 8 9 10 11 12 13 14 15 16 17 18 19 20 21 22 23 24 25 26 27 28 29 30 >30 |
| Order laboratory                              | 1 2 3 4 5 6 7 8 9 10 11 12 13 14 15 16 17 18 19 20 21 22 23 24 25 26 27 28 29 30 >30 |
| Order medications/write prescriptions         | 1 2 3 4 5 6 7 8 9 10 11 12 13 14 15 16 17 18 19 20 21 22 23 24 25 26 27 28 29 30 >30 |
| Medical education                             | 1 2 3 4 5 6 7 8 9 10 11 12 13 14 15 16 17 18 19 20 21 22 23 24 25 26 27 28 29 30 >30 |
| Lifestyle modification education              | 1 2 3 4 5 6 7 8 9 10 11 12 13 14 15 16 17 18 19 20 21 22 23 24 25 26 27 28 29 30 >30 |
| Education on BP measurement                   | 1 2 3 4 5 6 7 8 9 10 11 12 13 14 15 16 17 18 19 20 21 22 23 24 25 26 27 28 29 30 >30 |
| Recommendations to MD                         | 1 2 3 4 5 6 7 8 9 10 11 12 13 14 15 16 17 18 19 20 21 22 23 24 25 26 27 28 29 30 >30 |
| Documentation in medical record               | 1 2 3 4 5 6 7 8 9 10 11 12 13 14 15 16 17 18 19 20 21 22 23 24 25 26 27 28 29 30 >30 |

Please Use the following to Code your visit:

**99605** Medication therapy management service(s) provided by a pharmacist, individual, face-to-face with patient, with assessment and intervention if provided; initial 15 minutes, new patient

**99606** initial 15 minutes, established patient

**99607** each additional 15 minutes (List separately in addition to code for primary service)

Note: (Use 99607 in conjunction with 99605, 99606) ◀

CPT Code \_\_\_\_\_ Plus \_\_\_\_\_ units of CPT code 99607
